# Supplementary material for: Prenatal Choline Supplementation Improves Glucose Tolerance and Reduces Liver Fat Accumulation in Mouse Offspring Exposed to Ethanol during the Prenatal and Postnatal Periods
Source: MDPI journal article supplement (doi:10.3390/nu16091264), 2024-04-24
Supplement: s1 [file s1]

**Supplementary Table S1.** Composition of Lieber-DeCarli'82 liquid diets used in the study

|                             | Liquid control | 1.4% ethanol | 3.9% ethanol | 1.4% ethanol + choline |
|-----------------------------|----------------|--------------|--------------|------------------------|
| Protein (kcal/L)            | 151            | 151          | 151          | 151                    |
| Fat (kcal/L)                | 359            | 359          | 359          | 359                    |
| Carbohydrate (kcal/L)       | 490            | 135          | 135          | 135                    |
| Ethanol (mL, kcal/L)        | 0              | 17.8, 99.4   | 49.7, 276.9  | 49.7, 276.9            |
| Maltose dextrin (g, kcal/L) | 0              | 65, 255.6    | 20, 78.1     | 20, 78.1               |
| Choline (mg/L)              | 206            | 206          | 206          | 825                    |
| Total calorie (kcal/L)      | 1000           | 1000         | 1000         | 1000                   |

Lieber-DeCarli'82 control (F1259SP) and Lieber-DeCarli'82 ethanol (F1258SP) diets were purchased from Bio-serv, Flemington, NJ, USA. Diets were received in the form of powder and reconstituted in water before use. Ethanol, maltose dextrin, and additional choline were added during preparation of the liquid diets.
